# Supplementary material for: Silicon dioxide nanoparticles alleviate the threats of broomrape infection in tomato by inducing cell wall fortification and modulating ROS homeostasis
Source: Royal Society of Chemistry journal article supplement (doi:10.1039/c9en01255a), 2020-01-01

### Supplementary figure S1

Characterization of SiO<sub>2</sub>-nanoparticles using scanning electron microscope (SEM) (a), UV-VIZ spectroscopy (b) and Fourier transform infrared spectroscopy (FTIR, c).

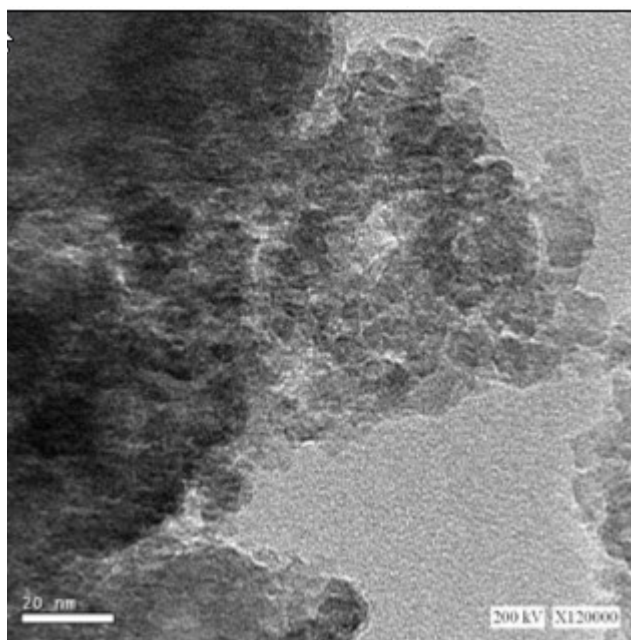

Supplement: c9en01255a1.pdf [file c9en01255a1.pdf]
